# Supplementary material
Source: PubMed Central journal article supplement (PMC7271609)
Supplement: 2019_223305-Disclosures_and_Contributions.pdf [file 2019_223305-Disclosures_and_Contributions.pdf]

Haematologica  
HAEMATOL/2019/223305  
Version 3

Clonal hematopoiesis in patients with ANCA-associated vasculitis

Christopher Maximilian Arends, Marlene Weiss, Friederike Christen,  
Claudia Eulenberg-Gustavus, Anthony Rousselle, Ralph Kettritz,  
Kai-Uwe Eckardt, Willy Chan, Kaja Hoyer, Mareike Frick, Lars  
Bullinger, Markus Bieringer, Adrian Schreiber, and Frederik Damm

Disclosures: none

Contributions: F.D. and A.S. designed the study; C.M.A., M.W., W.C., F.C., K.H., C.G.-E. and A.R. carried out experiments; C.M.A., M.W., F.C., F.D. and A.S. analyzed the data; M.A.K., C.M.A. and A.S. made the figures; C.M.A., M.W., F.D., A.S., M.F., K.-U.E., L.B., R.K. and M.B. drafted and/or revised the paper; all authors approved the final version of the manuscript.
